# Supplementary material for: Polyarylether-based COFs coordinated by Tb3+ for the fluorescent detection of anthrax-biomarker dipicolinic acid
Source: Royal Society of Chemistry journal article supplement (doi:10.1039/d3tb02070c), 2023-11-29
Supplement: d3tb02070c1.pdf [file d3tb02070c1.pdf]

**Polyarylether-based COFs coordinated by Tb<sup>3+</sup> for  
fluorescent detection of anthrax-biomarker dipicolinic acid**

Yinsheng Liu, Mingyue Wang, Yinfei Hui, Lei Sun, Yanrui Hao, Henlong Ren, Hao

Guo\*, Wu Yang\*

*Key Laboratory of Eco-functional Polymer Materials of Ministry of Education; Key  
Laboratory of Water Security and Water Environment Protection in Plateau  
Intersection of Ministry of Education; Key Lab of Bioelectrochemistry and  
Environmental Analysis of Gansu Province; College of Chemistry and Chemical  
Engineering, Northwest Normal University, Gansu International Scientific and  
Technological Cooperation Base of Water-Retention Chemical Functional Materials,  
Lanzhou 730070, PR China*

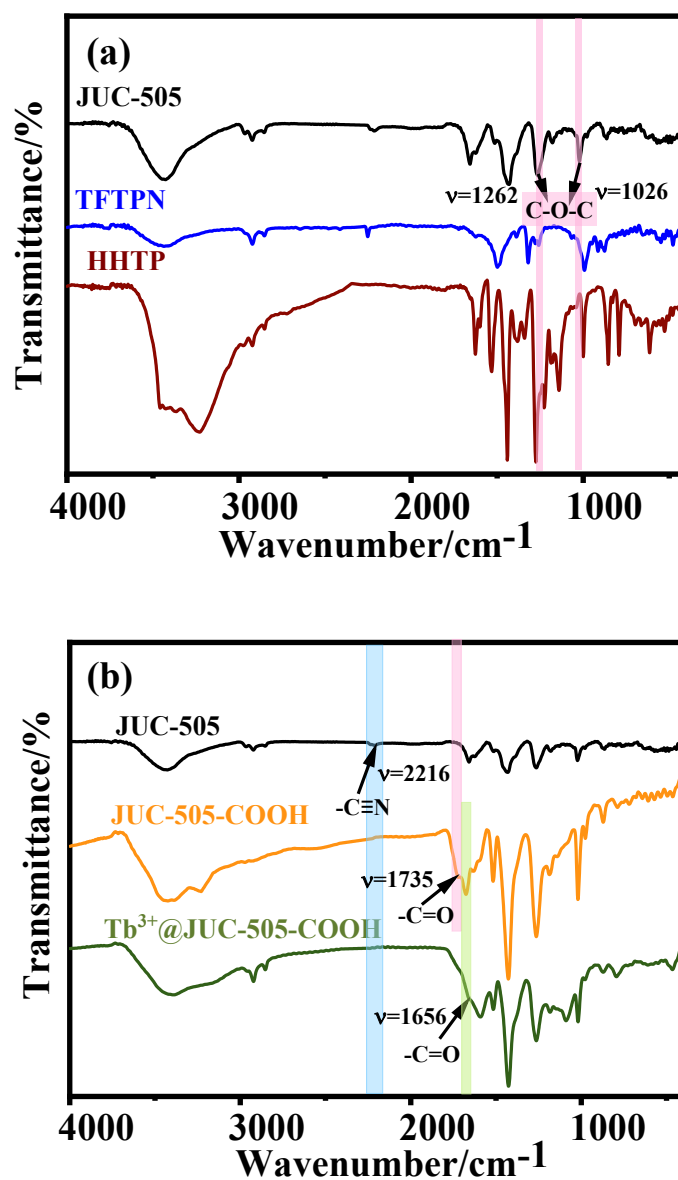

**Figure S1.** (a) FT-IR spectra of JUC-505, (b) FT-IR spectra of JUC-505, JUC-505-COOH, and Tb<sup>3+</sup>@JUC-505-COOH.

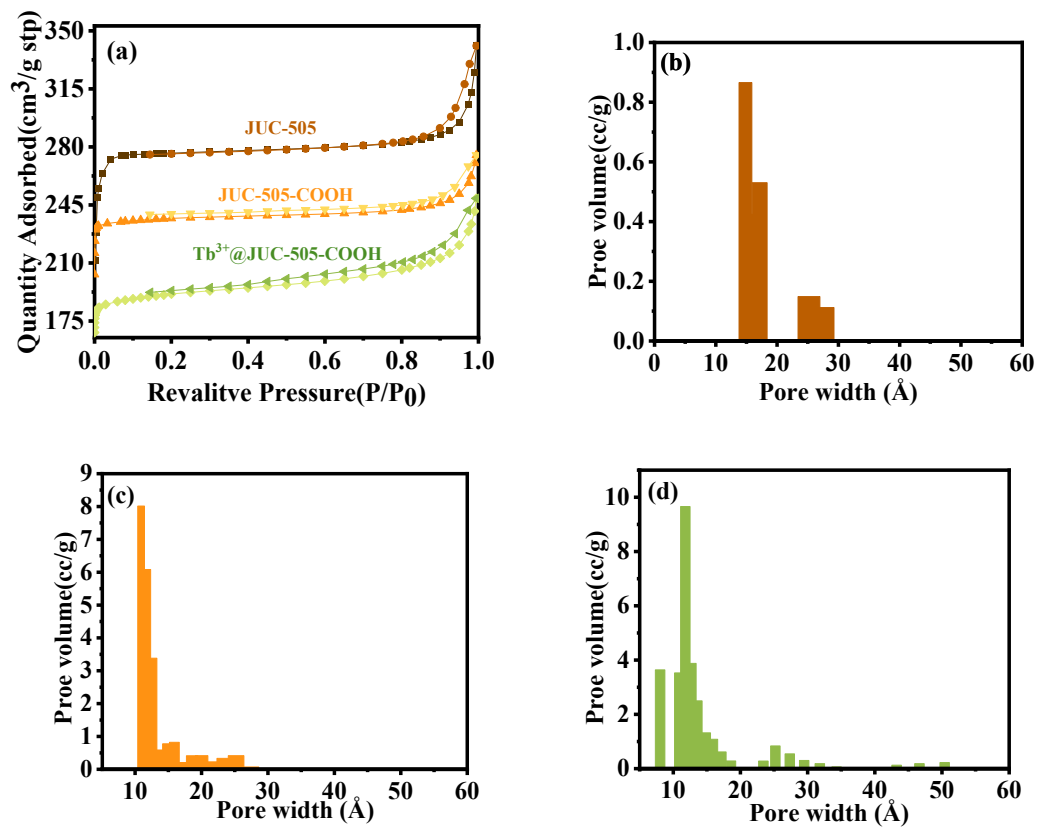

**Figure S2.** (a) N<sub>2</sub> adsorption and desorption isotherms for JUC-505 (brown curve), JUC-505-COOH (orange curve) and Tb<sup>3+</sup>@JUC-505-COOH (green curve) measured at 77 K. Pore size distributions of JUC-505 (b), JUC-505-COOH (c) and Tb<sup>3+</sup>@JUC-505-COOH (d)

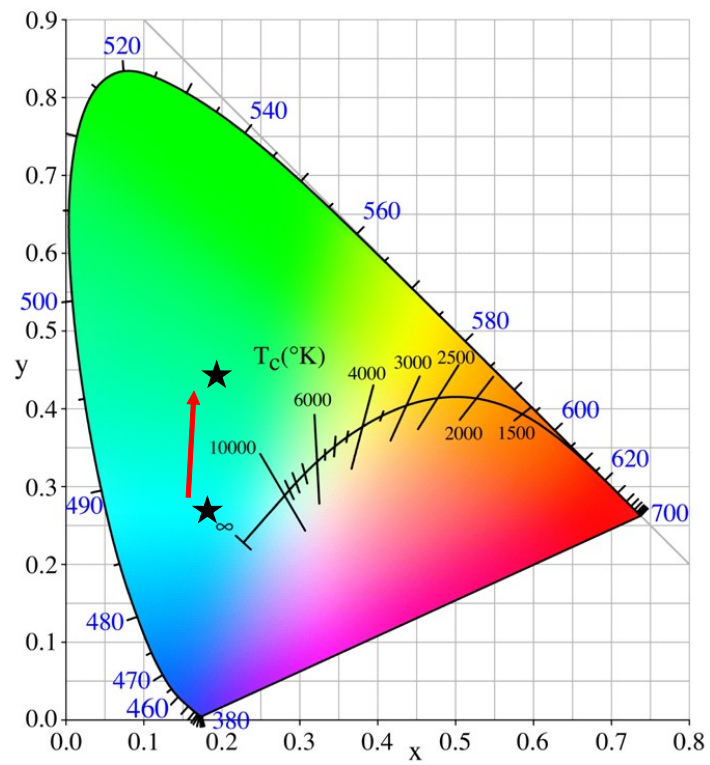

**Figure S3.** CIE chromaticity diagram of Tb<sup>3+</sup>@JUC-505-COOH.

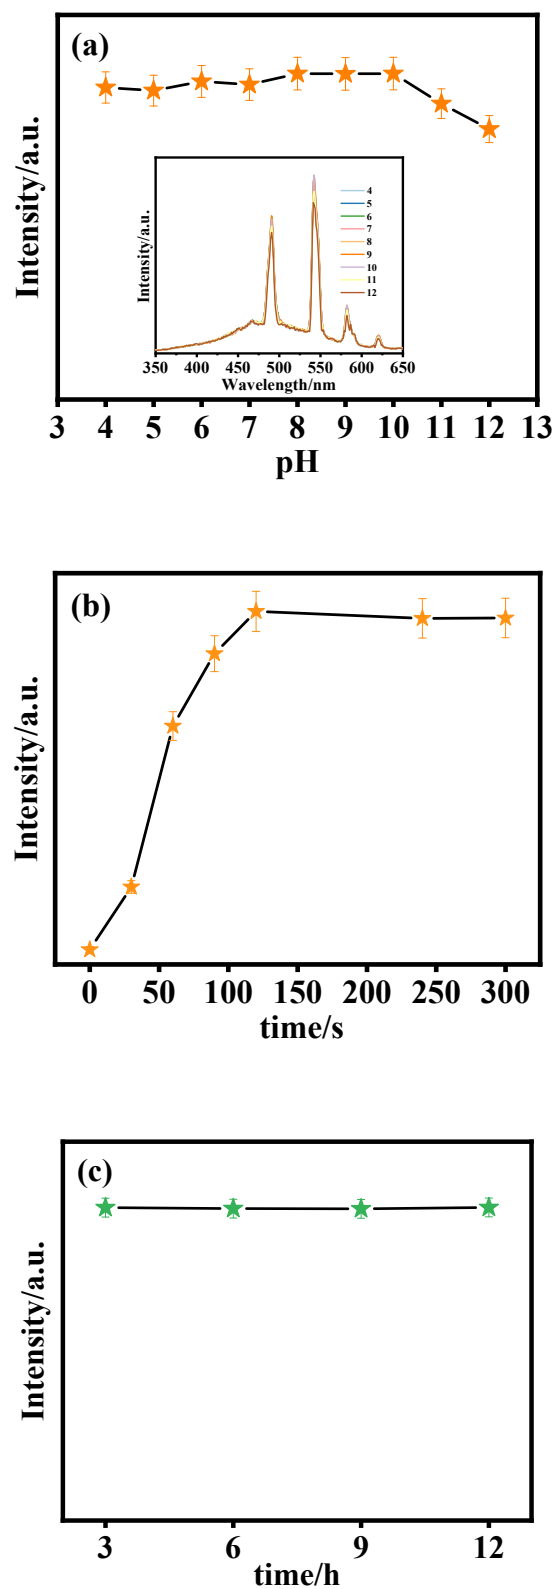

**Figure S4.** (a) Influence of pH on Tb<sup>3+</sup>@JUC-505-COOH/DPA system. (b) Time-dependent fluorescence intensity of Tb<sup>3+</sup>@JUC-505-COOH suspensions in DPA, (b)

time-light stability of the  $\text{Tb}^{3+}$ @JUC-505-COOH in the presence of DPA.

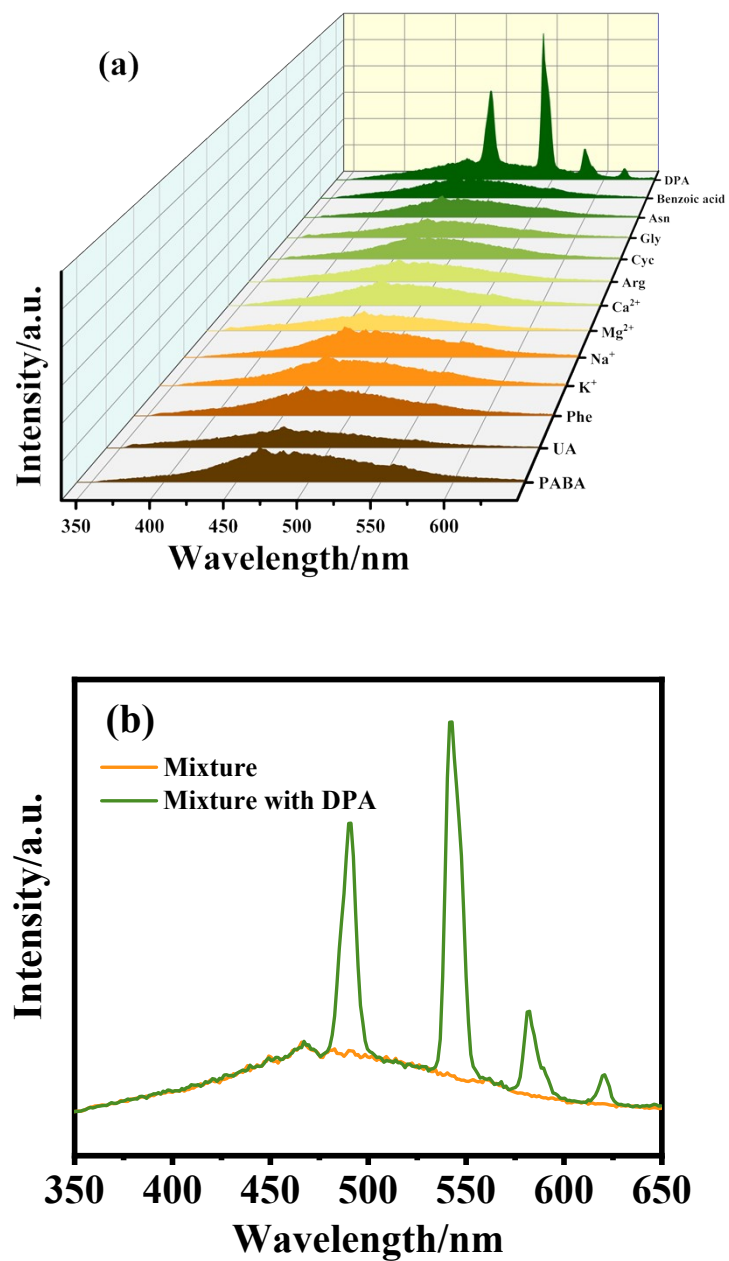

Figure S5. Emission spectra of  $\text{Tb}^{3+}$ @JUC-505-COOH introduced into different body fluids components (a) and their mixture (b).

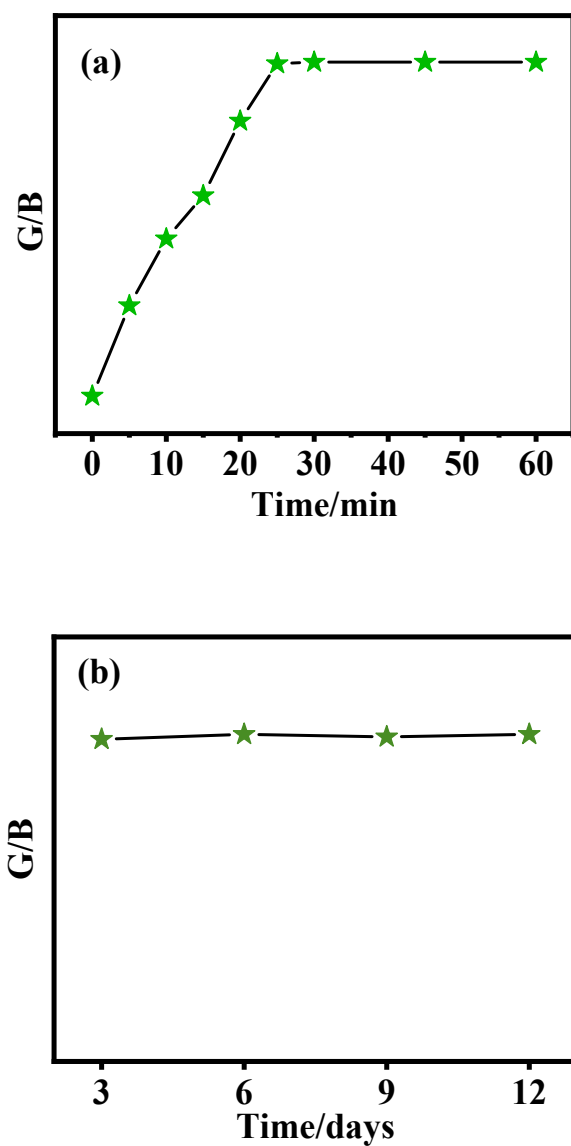

**Figure S6.** (a) Time-dependent G/B intensity of paper-based probe in DPA, (b) time-light stability of the paper-based probe in the presence of DPA.

**Table S1** Comparison of the DPA detection properties of Tb<sup>3+</sup>@JUC-505-COOH with other sensor reported in previous literatures.

| <b>Materials</b>                   | <b>Linear range<br/>(<math>\mu\text{M}</math>)</b> | <b>LOD (<math>\mu\text{M}</math>)</b> | <b>Reference<br/>s</b> |
|------------------------------------|----------------------------------------------------|---------------------------------------|------------------------|
| R6H@Eu(BTC)                        | 0-120                                              | 4.5                                   | [S1]                   |
| His@ZIF-8/Tb <sup>3+</sup>         | 0.08-10                                            | 0.02                                  | [S2]                   |
| Eu/CdTe                            | 20–100                                             | 1.72                                  | [S3]                   |
| Eu-PB MOG 1                        | 0–50                                               | 0.298                                 | [S4]                   |
| EBT-Eu                             | 2-10                                               | 2                                     | [S5]                   |
| Tb <sup>3+</sup> @JUC-505-<br>COOH | 0-120                                              | 0.615                                 | This work              |

## References

- [S1] K. Y. Shi, Z. H. Yang, L. H. Dong, B. Yu, *Sensors and Actuators B* 266 (2018) 263–269.
- [S2] L. Guo, M. S. Liang, X. L. Wang, R. M. Kong, G. Chen, L. Xia, F. L. Qu, *Chem. Sci.* 11(9) (2020) 2407-2413.
- [S3] J. Othonga, J. Boonmaka, F. Kielarb, S. Hadsadeec, S. Jungstittiwongc, S. Youngmea, *Sensors and Actuators B* 316 (2020) 128156.
- [S4] X. Wang, Y. Wang, X. Y. Wang, C. Y. Hu, X. J. Wu, W. Guo, S. J. Zhen, C. Z. Huang, Y. F. Li, *Chemical Engineering Journal* 435 (2022) 134912.
- [S5] X. Zhang, M. A. Young, O. Lyandres, R. P. Van Duyne, *Journal of American Chemical Society* 127 (2005) 4484–4489.
